# Supplementary material
Source: PubMed Central journal article supplement (PMC1307624)
Supplement: 3-embor067-s1.pdf [file 3-embor067-s1.pdf]

## Supplementary material

### Methods

**Strains.** Nematodes were grown at 20°C under standard conditions (Brenner 1974). Wild type and *lin-15(n765ts)* strains were obtained from the *Caenorhabditis* Genetics Center. The mutant *crh-1(tz2)II* has a 979 bp deletion (54730-55708 of Y41C4A) corresponding to 38aa of exon VII. The *ckk-1(tm421)III* strain has a 543bp deletion (9237-9779 of C05H8) corresponding to 151 amino acids of the CKK-1 protein. Both strains were isolated in a nested PCR screen of the trimethylpsoralen/UV treated stock strains as described (Gengyo-Ando and Mitani 2000).

**cDNA isolation and expression.** A previously unrecognized exon of *ckk-1* that appends 75 amino acids to the predicted C-terminus was identified by 3'-RACE. We detected no enzymatic or Ca<sup>2+</sup>/CaM-dependency differences between the full-length CKK-1 (1-432) and the shorter form (1-357) used in previous studies (Tokumitsu *et al.*, 1999) (data not shown). Herein we use the full-length version and the revised sequence has been submitted to Genebank (Accession Number: AB016838). *C. elegans* CaM-KI (*cmk-1*) was cloned and expressed as previously described (Eto *et al.*, 1999). Point mutants (Thr179Ala and Lys52Ala) of CMK-1 were generated using standard site-directed mutagenesis techniques and sequenced.

*crh-1* cDNA was cloned in a screen of a  $\lambda$ ZAP *C. elegans* embryonic cDNA library probed with a fragment amplified from yk217f1 (kindly provided from Y. Kohara at National Institute of Genetics, Mishima, Japan), which was selected for its similarity to

the C-terminal coding region of mouse CREB. Four clones were isolated and sequenced from  $2 \times 10^5$  plaques screened; one (*crh-1 $\beta$* ) contained a 1262 nucleotide ORF, while the others lacked translation start sites. 5'-RACE-PCR identified three 5' splice variants (*crh-1 $\alpha$* , *crh-1 $\beta$* , and *crh-1 $\gamma$ 1*) all of which preserve the integrity of the KID and bZIP domains. Further analysis of ESTs (from Y. Kohara) identified a fourth variant (*crh-1 $\gamma$ 2*). All sequences submitted to Genbank (Accession Numbers: *crh-1 $\alpha$* ; AB081597, *crh-1 $\beta$*  AB081595, *crh-1 $\gamma$ 1* AB081598, and *crh-1 $\gamma$ 2* AB081596). The originally isolated full-length clone, *crh-1 $\beta$* , was used for further experiments.

For GAL4-binding domain mammalian expression plasmids, the transactivation domain (residues 1-242) of either wild-type or Ser29Ala mutant of *crh-1 $\beta$*  was ligated into the pM plasmid (CLONTECH). pET16b-vectors encoding His-CRH-1 $\beta$  and His-CRH-1 $\beta$  (Ser29Ala) were created by standard PCR, subcloning, and site-directed mutagenesis techniques.

***In vitro* phosphorylation of CRH-1 by *C. elegans* CaM-kinase cascade.** Recombinant GST-CMK1 (0.94  $\mu$ g) was activated at 30 °C for 20 min with a CaMKK preparation (20ng) partially purified from *ckk-1* or mock transfected COS-7 cells by CaM-Sepharose as previously described (Eto *et al.*, 1999). CKK-1 alone (0.5 ng), activated CMK-1 (22ng) or mock activated (unactivated) CMK-1 (22ng) were incubated with recombinant wild type or Ser29Ala mutant of CRH-1 $\beta$  (0.2  $\mu$ g) in 30 mM HEPES (pH 7.5), 5 mM MgAc<sub>2</sub>, 1 mM DTT, 2 mM CaCl<sub>2</sub>, 3  $\mu$ M CaM and 100  $\mu$ M of either [ $\gamma$ -<sup>32</sup>P]-ATP or cold ATP at 30 °C for 10 min. After addition of SDS-PAGE buffer, samples were subjected to SDS-10% PAGE followed by either autoradiography or

immunoblotting using anti-phospho-CREB antibody (NEB) or anti-His-tag antibody (Sigma).

**Transcriptional activation mediated by *crh-1*.** COS-7 cells (6-well dishes) were transfected with 0.5  $\mu$ g of reporter plasmid (pFR-5xGAL4-binding element-Luciferase, Stratagene), either pM-*crh-1 $\beta$*  or pM-*crh-1 $\beta$*  (Ser29Ala), and a combination of expression plasmids (pME18s) encoding wild type or mutant CMK-1 (0.5  $\mu$ g) and/or CKK-1 (0.5  $\mu$ g), or the catalytic subunit of mammalian PKA (0.5  $\mu$ g). After 24 hr, cells were serum-deprived for 6 hr then stimulated with 1  $\mu$ M ionomycin for 12 hr and lysed. Luciferase activities were detected by standard methods using PicaGene (Toyo Inki).

**Transgenic plasmid construction.** The promoter fusion gene *ckk-1::GFP* includes 2.4kb genomic sequence from C05H8 upstream from the start site inserted into pPD95.79 (from A. Fire). Similarly, *cmk-1::GFP* includes 5.4kb upstream of the *cmk-1* start site transferred into pPD95.79 GFP, fusing CMK-1(aa1-25) with GFP. The *cmk-1* promoter construct also drove expression of *cmk-1* cDNAs: pYT41.2.2-*cmk-1::CMK-1* (wild type); pYT42.2.5-*cmk-1::CMK-1* (1-295), pYT42.2.2-*cmk-1::CMK-1* (1-295, T179D), pYT42.2.6-*cmk-1::CMK-1* (1-295, T179A) and pYT41.3.1-*cmk-1::CRH-1 $\beta$*  wild type . pCRE::GFP was generated by replacing the *hsp16/2* promoter of pPD118.26 (from A. Fire) with a synthetic ds78-mer containing four tandem CRE repeats (AGCCTGACGTCAG).

**Whole-mount *in situ* hybridization.** *In situ* hybridization for whole-mount animals was performed by using digoxigenin-UTP-labeled riboprobes representing full-length sense or antisense *crh-1 $\beta$*  cDNA sequences for overnight hybridization at 60°C.

## References

- Brenner, S. (1974) The genetics of *Caenorhabditis elegans*. *Genetics*, **77**, 71-94.
- Eto, K., Takahashi, N., Kimura, Y., Masuho, Y., Arai, K., Muramatsu, M.A. and Tokumitsu, H. (1999) Ca<sup>2+</sup>/Calmodulin-dependent protein kinase cascade in *Caenorhabditis elegans*. Implication in transcriptional activation. *J. Biol. Chem.*, **274**, 22556-22562.
- Gengyo-Ando, K. and Mitani, S. (2000) Characterization of mutations induced by ethyl methanesulfonate, UV, and trimethylpsoralen in the nematode *Caenorhabditis elegans*. *Biochem. Biophys. Res. Commun.*, **269**, 64-69.
- Tokumitsu, H., Takahashi, N., Eto, K., Yano, S., Soderling, T.R. and Muramatsu, M. (1999) Substrate recognition by Ca<sup>2+</sup>/Calmodulin-dependent protein kinase kinase. Role of the arg-pro-rich insert domain. *J. Biol. Chem.*, **274**, 15803-15810.
